# Supplementary material for: Amphiphilic Polymer Capped Perovskite Compositing with Nano Zr‐MOF for Nanozyme‐Involved Biomimetic Cascade Catalysis
Source: PubMed Central journal article supplement (PMC10625115; doi:10.1002/advs.202304149), 2023-08-27
Supplement: ADVS-10-2304149-s001.pdf [file ADVS-10-2304149-s001.pdf]

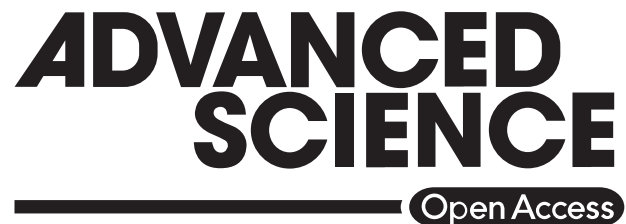

## Supporting Information

for *Adv. Sci.*, DOI 10.1002/adv.202304149

Amphiphilic Polymer Capped Perovskite Compositing with Nano Zr-MOF for  
Nanozyme-Involved Biomimetic Cascade Catalysis

*Qiuyu Ye, Enxian Yuan, Jin Shen, Mingli Ye, Qin Xu, Xiaoya Hu, Yun Shu\* and Huan Pang\**

Supporting Information

**Amphiphilic Polymer Capped Perovskite Compositing with Nano Zr-MOF for  
Nanozyme-Involved Biomimetic Cascade Catalysis**

*Qiuyu Ye, Enxian Yuan, Jin Shen, Mingli Ye, Qin Xu, Xiaoya Hu, Yun Shu\*, Huan  
Pang\**

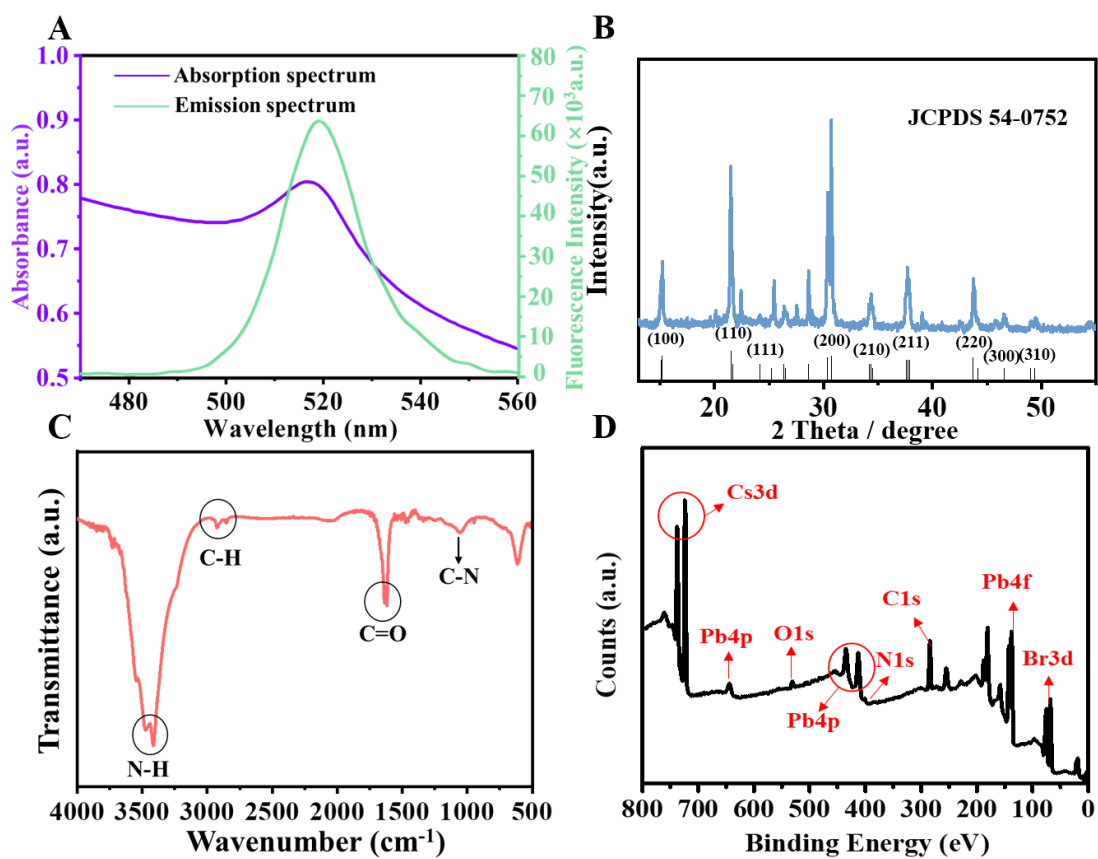

**Figure S1.** (A) UV-vis absorption (purple) and fluorescence (green) spectra of OPA-CsPbBr<sub>3</sub> NCs. (B) XRD, (C) FT-IR, and (D) XPS spectra of OPA-CsPbBr<sub>3</sub> NCs.

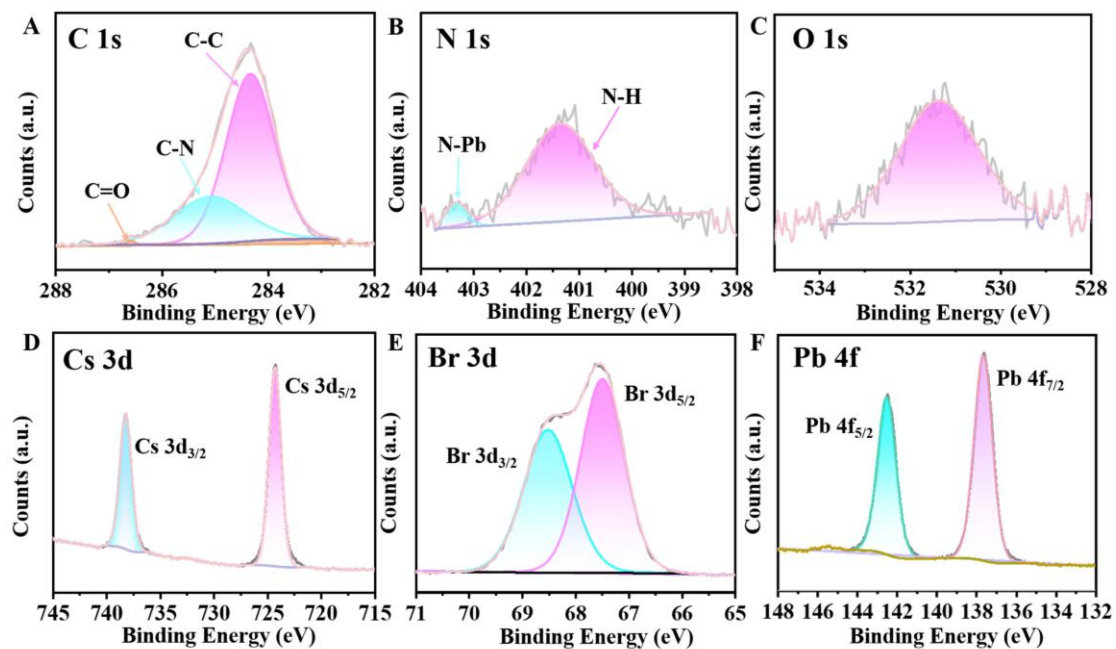

**Figure S2.** (A) C 1s, (B) N 1s, (C) O 1s, (D) Cs 3d, (E) Br 3d, (F) Pb 4f XPS spectra of OPA-CsPbBr<sub>3</sub> NCs.

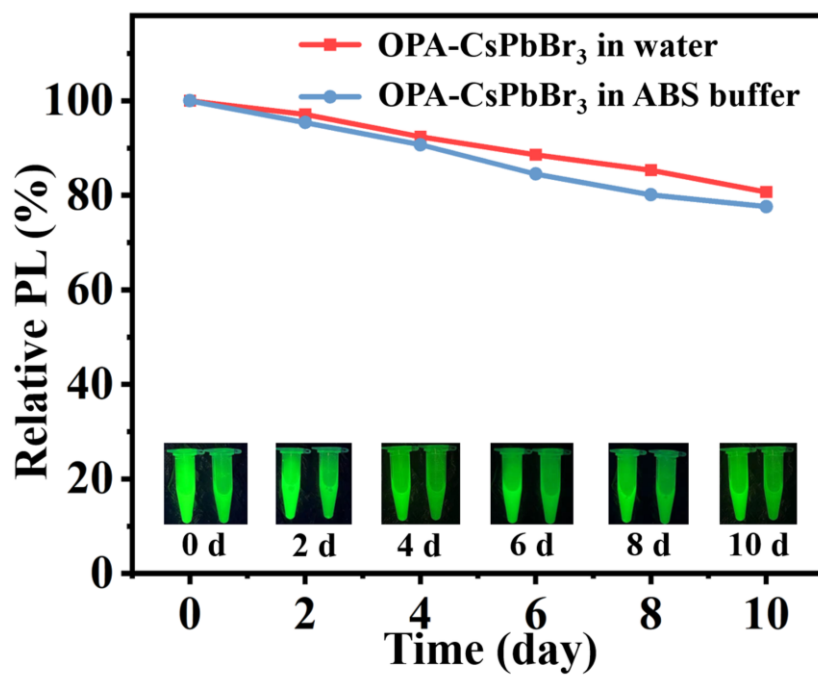

**Figure S3.** Fluorescent stability diagrams of OPA-CsPbBr<sub>3</sub> NCs in water and HAc-NaAc buffer (pH=4). The inset shows the optical images of OPA-CsPbBr<sub>3</sub> NCs in water (left) and HAc-NaAc buffer (right) under 365 nm UV light at different time periods.

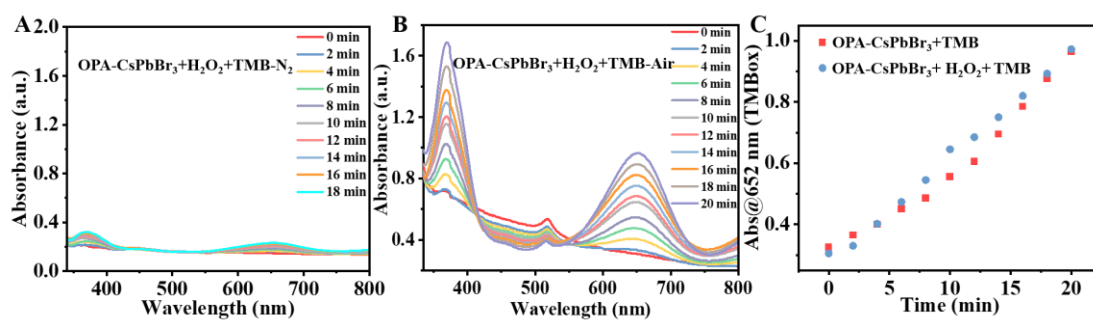

**Figure S4.** (A) Real-time UV-vis absorption spectra of the OPA-CsPbBr<sub>3</sub>+H<sub>2</sub>O<sub>2</sub>+TMB system under N<sub>2</sub> environment. (B) Real-time UV-vis absorption spectra of the OPA-CsPbBr<sub>3</sub>+H<sub>2</sub>O<sub>2</sub>+TMB system under air environment. (C) Time-dependent UV-vis absorbance of TMB at 652 nm by OPA-CsPbBr<sub>3</sub> NCs catalyzing TMB in absence and presence of H<sub>2</sub>O<sub>2</sub>, respectively.

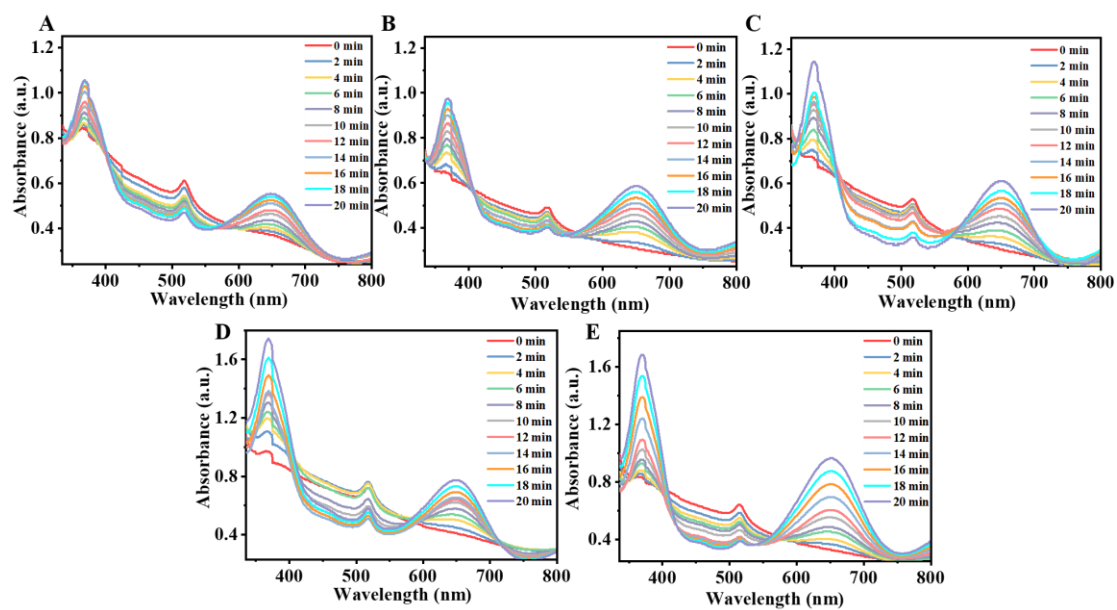

**Figure S5.** Real-time UV-vis absorption spectra of the catalyzed oxidation of different concentrations of TMB through the oxidase-like activity by OPA-CsPbBr<sub>3</sub> NCs. (A) 0.2 mM, (B) 0.4 mM, (C) 0.6 mM, (D) 0.8 mM, (E) 1.0 mM.

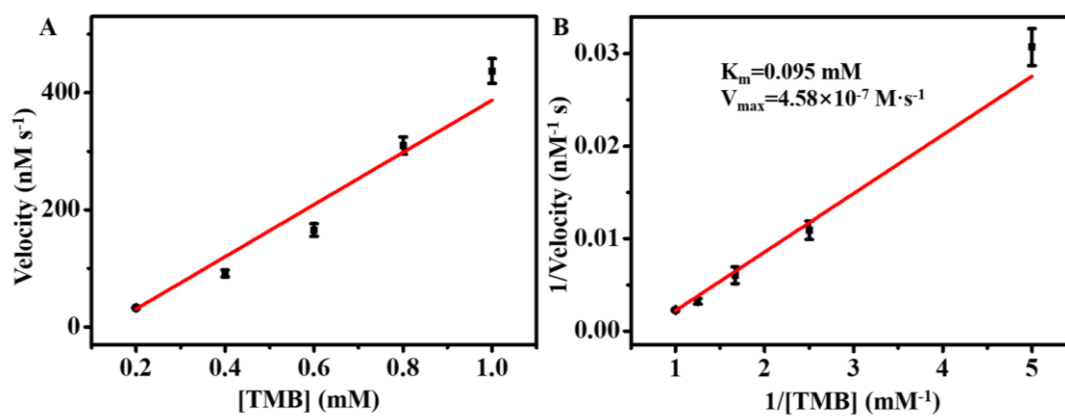

**Figure S6.** Steady-state kinetics for OPA-CsPbBr<sub>3</sub> catalytic oxidation of TMB in buffer (HAc-NaAc, pH = 4). (A) The Velocity as a function of [TMB]. (B) The Lineweaver-Burk plot.



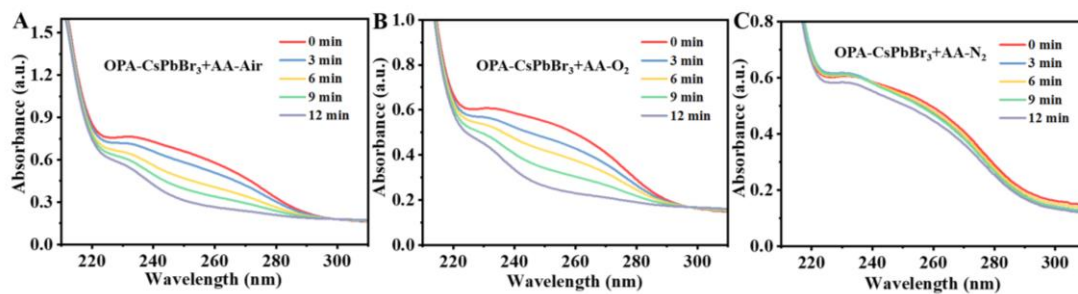

**Figure S7.** Real-time UV absorption spectra of AA after autooxidation catalyzed by OPA-CsPbBr<sub>3</sub> nanozyme under (A) Air, (B) O<sub>2</sub> and (C) N<sub>2</sub> environment, respectively.

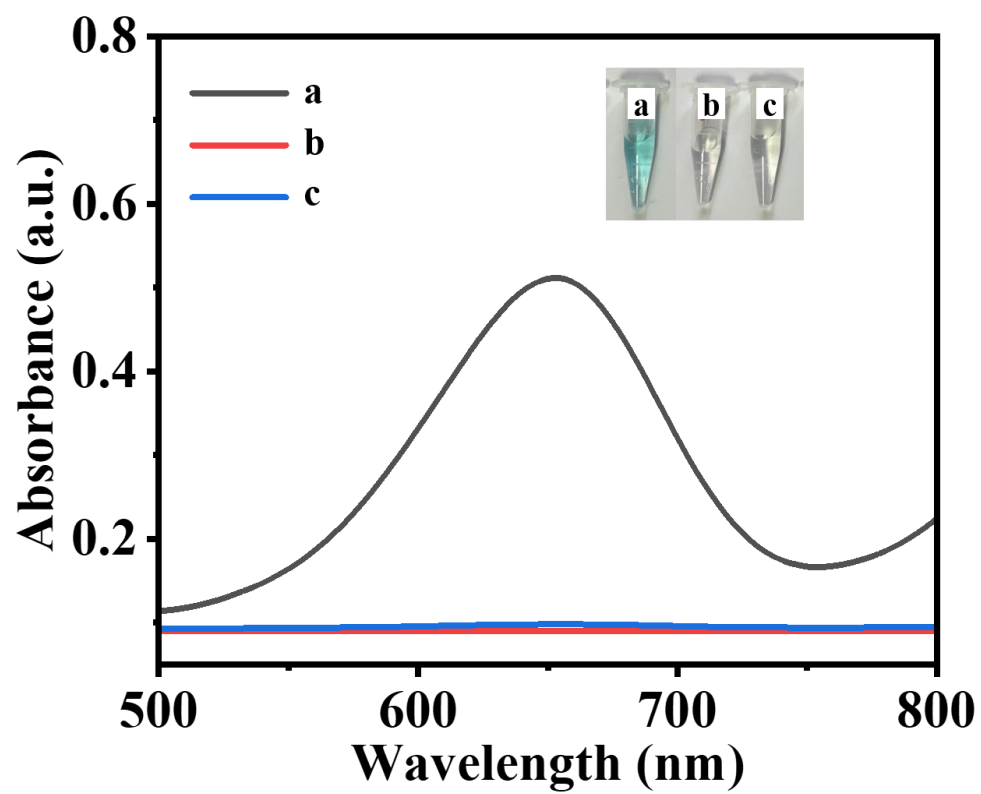

**Figure S8.** UV-vis absorption spectra of OPA-CsPbBr<sub>3</sub>+AA+TMB&HRP (a), AA+TMB&HRP (b) and OPA-CsPbBr<sub>3</sub>+AA+TMB (c).

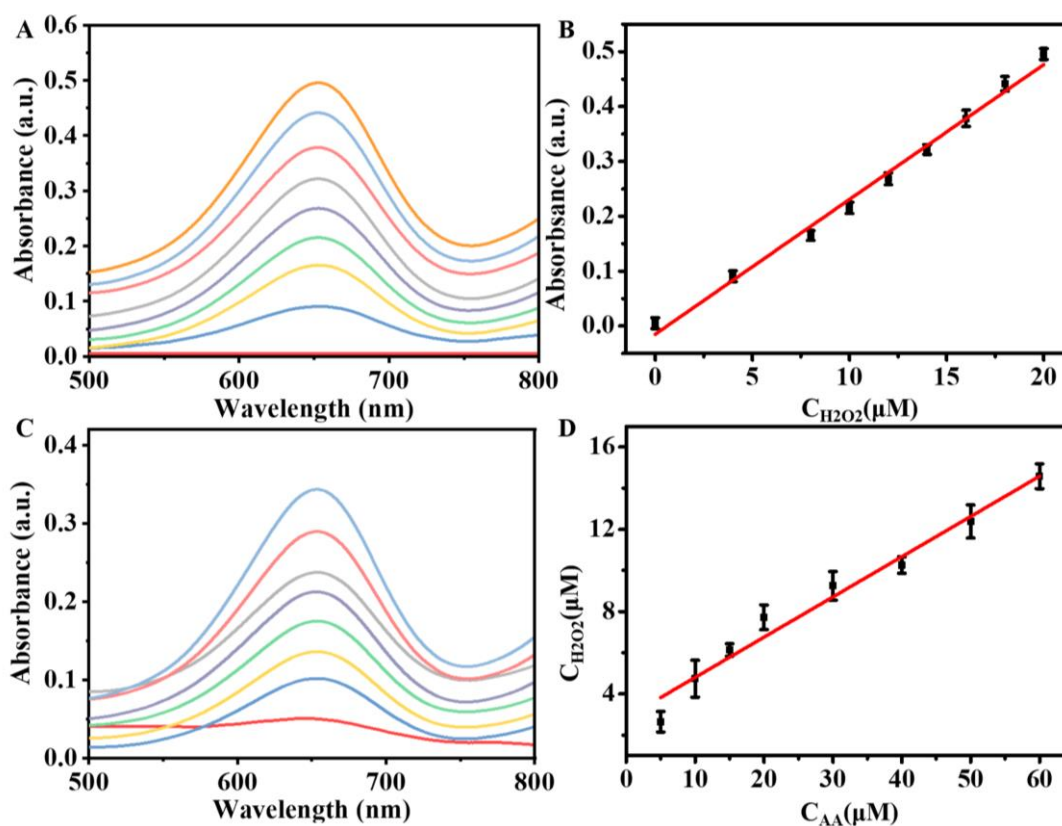

**Figure S9.** (A) UV-vis absorption spectra of different concentrations of H<sub>2</sub>O<sub>2</sub> added to TMB-HRP solution. (B) Standard calibration plot for detection of H<sub>2</sub>O<sub>2</sub> by the colorimetric TMB-HRP method. (C) UV-vis absorption spectra of H<sub>2</sub>O<sub>2</sub>-TMB-HRP solution, in which the H<sub>2</sub>O<sub>2</sub> was produced by OPA-CsPbBr<sub>3</sub> catalytic oxidation of different concentrations of AA. (D) Calibration curve of the generated H<sub>2</sub>O<sub>2</sub> during the CsPbBr<sub>3</sub> catalyzing oxidation of different concentration of AA.

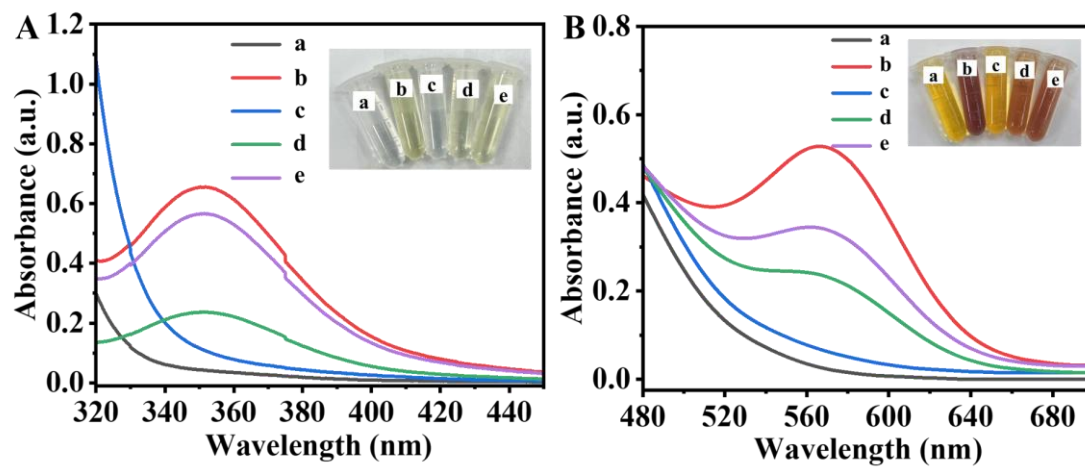

**Figure S10.** (A) Detection of  $\text{H}_2\text{O}_2$  by iodide method. a: KI, b: KI+ $\text{H}_2\text{O}_2$ , c: KI+AA, d: KI+OPA-CsPbBr<sub>3</sub>+AA (50  $\mu\text{M}$ ), e: KI+OPA-CsPbBr<sub>3</sub>+AA (100  $\mu\text{M}$ ). (B) Detection of  $\text{H}_2\text{O}_2$  by FOX assay. a: FOX, b: FOX+ $\text{H}_2\text{O}_2$ , c: FOX+AA, d: FOX+OPA-CsPbBr<sub>3</sub>+AA (50  $\mu\text{M}$ ), e: FOX+OPA-CsPbBr<sub>3</sub>+AA (100  $\mu\text{M}$ ).

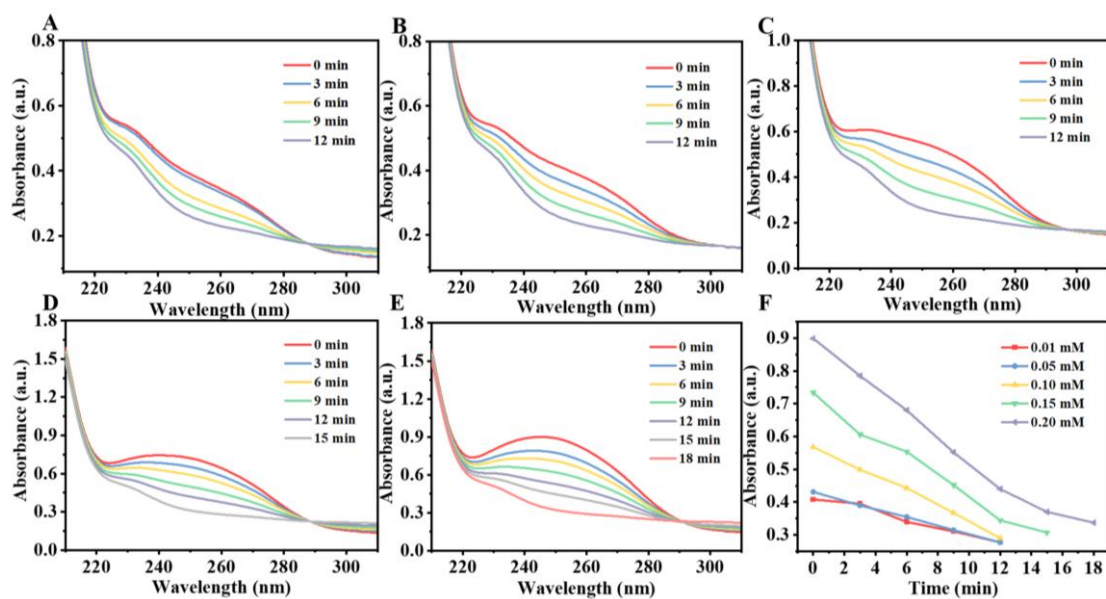

**Figure S11.** Real-time UV-vis absorption spectra of different concentrations of AA catalyzed oxidized by the OPA-CsPbBr<sub>3</sub> nanozyme. (A) 0.01 mM, (B) 0.05 mM, (C) 0.10 mM, (D) 0.15 mM, (E) 0.20 mM. (F) Time-dependent UV-vis absorbance at 259 nm of different concentrations of AA after catalyzed oxidized by OPA-CsPbBr<sub>3</sub> NCs.

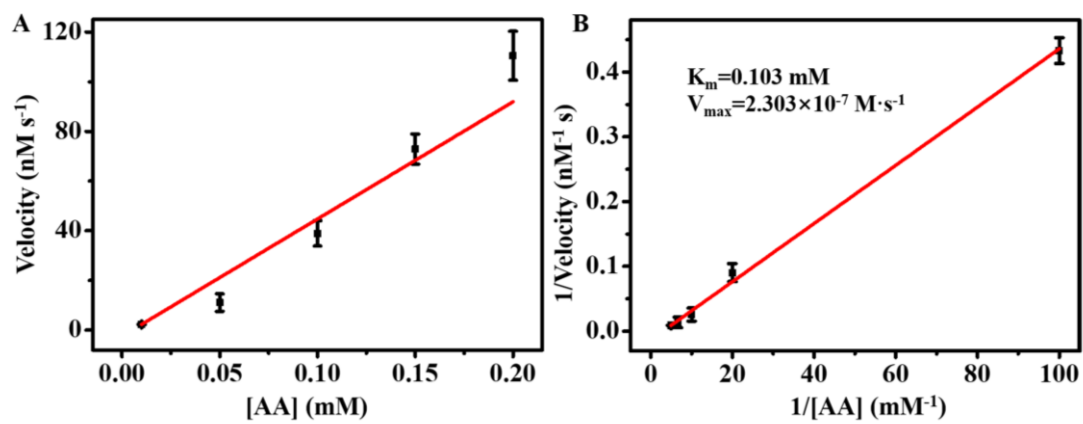

**Figure S12.** Steady-state kinetics of AA oxidation catalyzed by OPA-CsPbBr<sub>3</sub> NCs in HAc-NaAc buffer. (A) Velocity as a function of [AA]. (B) The Lineweaver-Burk plot.

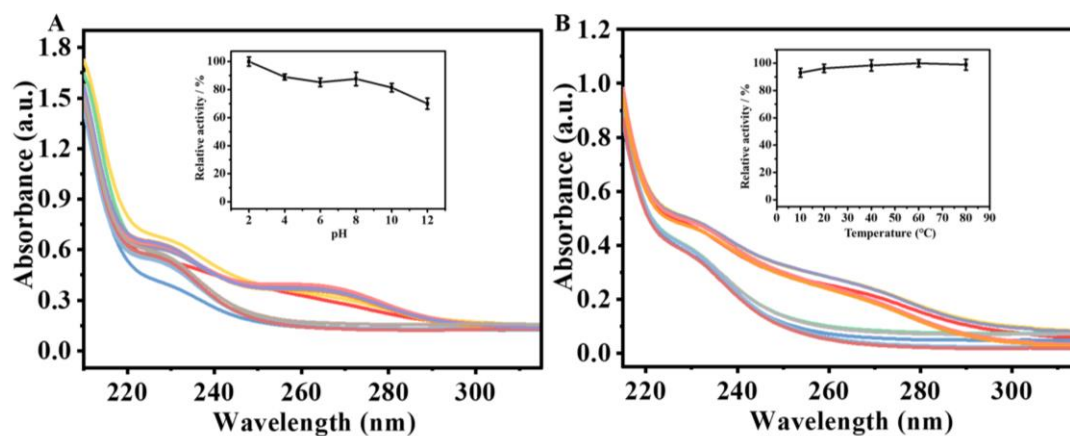

**Figure S13.** (A) UV-vis absorption curves of AA catalyzed by OPA-CsPbBr<sub>3</sub> NCs at different pH (inset shows relative activity). (B) UV-vis absorption curves of AA catalyzed by OPA-CsPbBr<sub>3</sub> NCs at different temperature (inset shows relative activity).

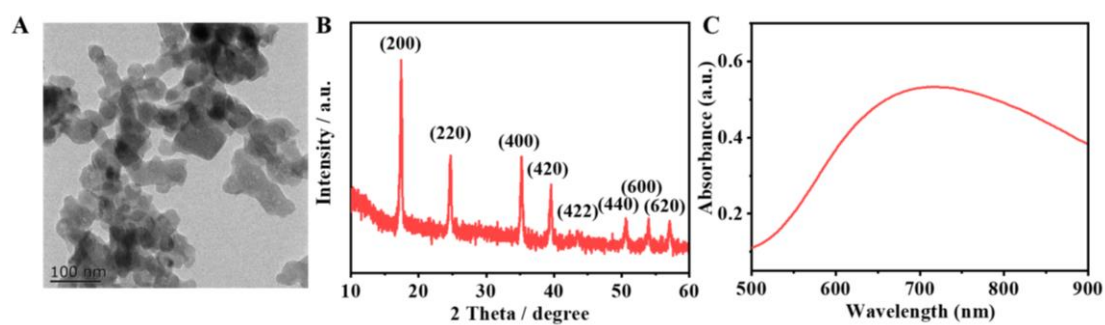

**Figure S14.** (A) TEM image, (B) XRD spectrum, (C) Absorption spectrum of PB nanoparticles.



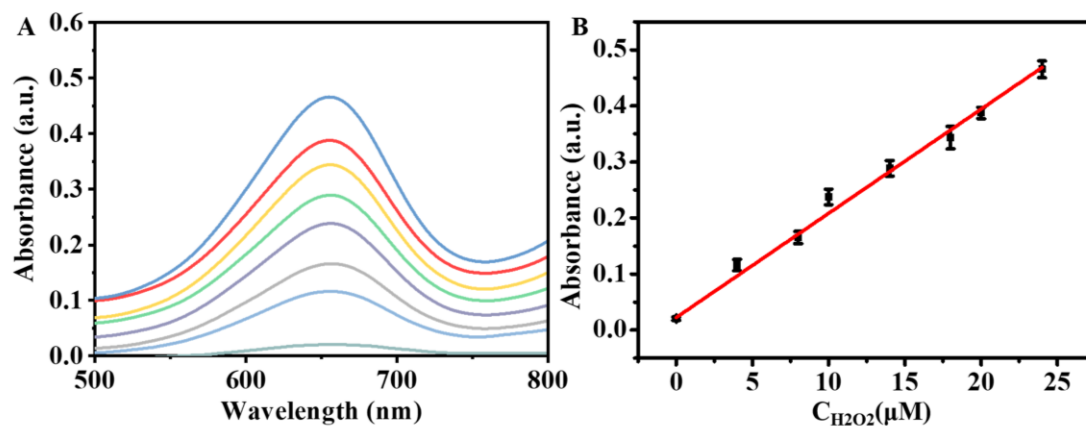

**Figure S15.** (A) UV-vis absorption spectra of PB-TMB-H<sub>2</sub>O<sub>2</sub> system with different concentrations of H<sub>2</sub>O<sub>2</sub>. (B) Corresponding calibration curve.

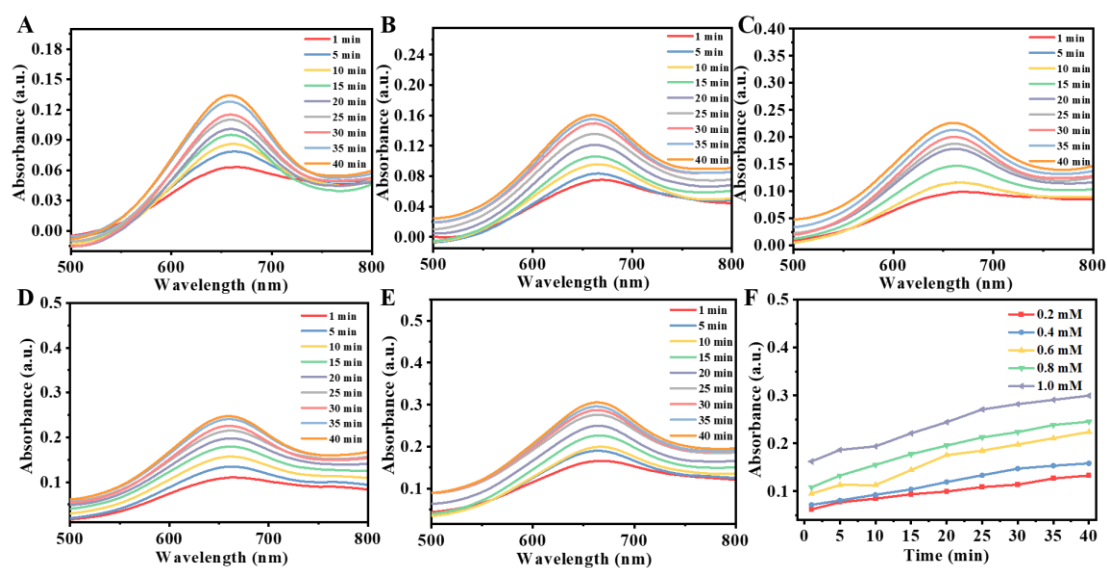

**Figure S16.** Real-time UV-vis absorption spectra of the PB catalyzed oxidation of different concentrations of TMB through the peroxidase-like activity. (A) 0.2 mM, (B) 0.4 mM, (C) 0.6 mM, (D) 0.8 mM, (E) 1 mM. (F) Time-dependent UV-vis absorbance at 652 nm with different concentrations of TMB.

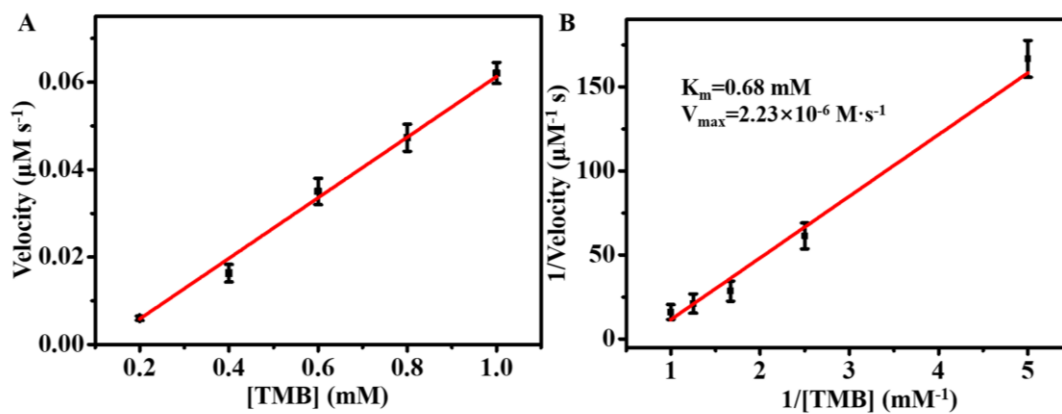

**Figure S17.** Steady-state kinetics for PB catalytic reaction with TMB and  $\text{H}_2\text{O}_2$  (20  $\mu\text{M}$ ) in HAc-NaAc buffer. (A) The velocity as a function of [TMB]. (B) The Lineweaver-Burk plot.

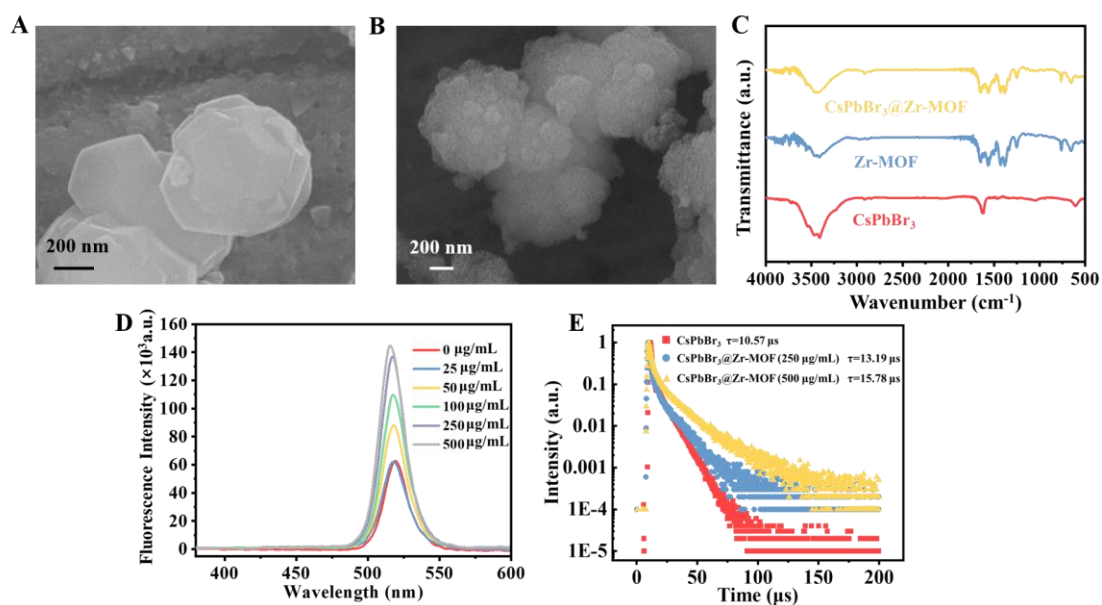

**Figure S18.** SEM images of (A) Zr-MOF and (B) CsPbBr<sub>3</sub>@Zr-MOF nanocomposite. (C) FT-IR spectra of CsPbBr<sub>3</sub>, Zr-MOF, and CsPbBr<sub>3</sub>@Zr-MOF nanocomposite. (D) Fluorescence spectra of CsPbBr<sub>3</sub>@Zr-MOF synthesized by adding different amounts of Zr-MOF. (E) Time-resolved FL decay curves of CsPbBr<sub>3</sub> at 520 nm for CsPbBr<sub>3</sub>@Zr-MOF nanocomposite synthesized using different amounts of Zr-MOF.

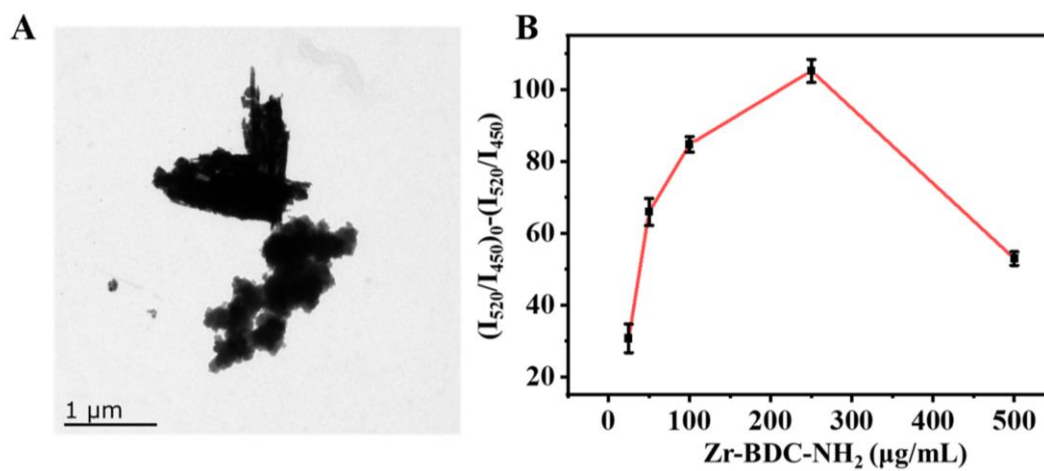

**Figure S19.** (A) TEM image of CsPbBr<sub>3</sub>@Zr-MOF nanocomposite after addition of AA (500 μM). (B) The fluorescence intensity ratio variation of CsPbBr<sub>3</sub>@Zr-MOF nanocomposite synthesized by adding different amounts of Zr-MOF before and after adding AA (0.1 mM).

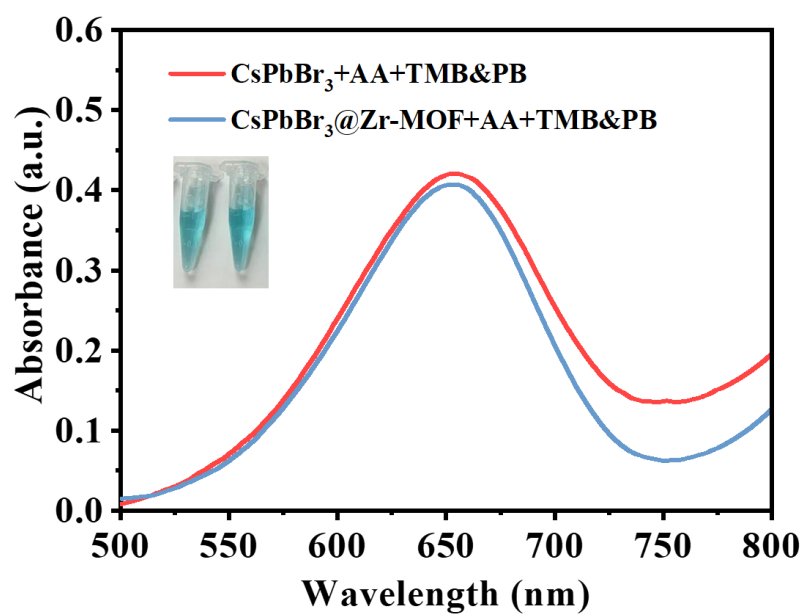

**Figure S20.** UV-vis absorption curves of the oxidation of TMB by AA catalyzed by CsPbBr<sub>3</sub> NCs and CsPbBr<sub>3</sub>@Zr-MOF nanocomposite.

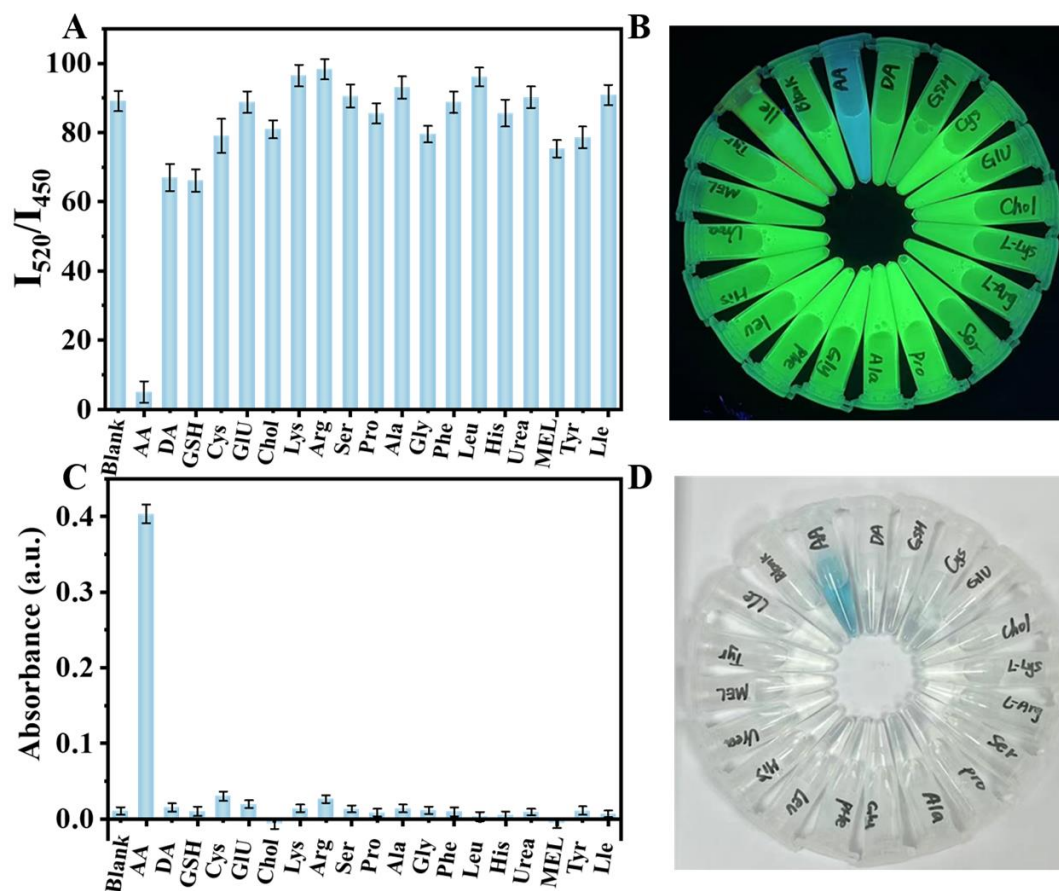

**Figure S21.** (A) The fluorescence intensity variation of CsPbBr<sub>3</sub>@Zr-MOF nanocomposite in the presence of AA and other molecules (0.1 mM), respectively. (B) Image of the samples under 365 nm UV light irradiation. (C) The UV-vis absorbance of TMBox produced by the CsPbBr<sub>3</sub>@Zr-MOF+PB nanozymes cascade reaction using AA and other molecules as the potential interference substrates. (D) Image of the samples.

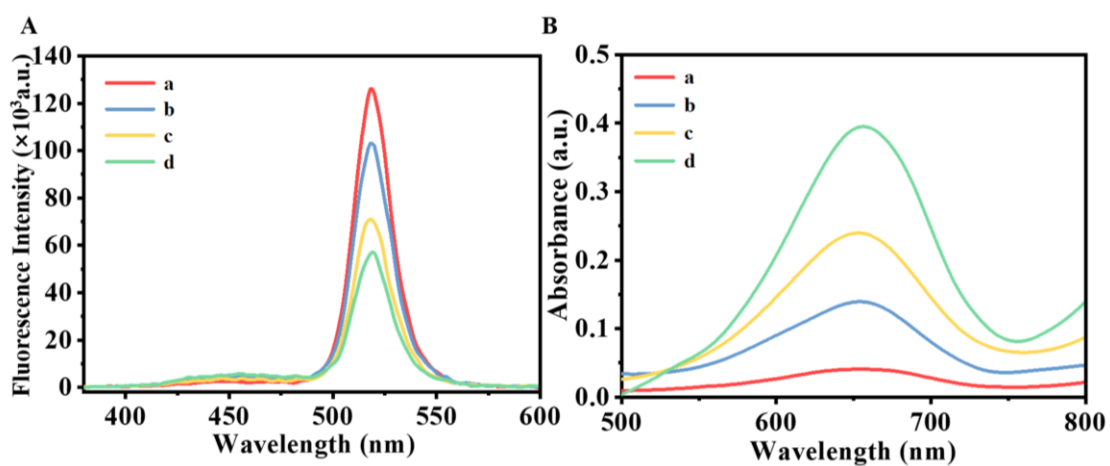

**Figure S22.** (A) Fluorescence spectra of CsPbBr<sub>3</sub>@Zr-MOF after addition different concentrations of AA (a: 0  $\mu$ M, b: 20  $\mu$ M, c: 50  $\mu$ M, d: 100  $\mu$ M) in human serum sample. (B) UV-vis absorption spectra of TMBox produced by the CsPbBr<sub>3</sub>@Zr-MOF+PB nanozymes cascade reaction system after adding different concentrations of AA (a: 0  $\mu$ M, b: 20  $\mu$ M, c: 50  $\mu$ M, d: 100  $\mu$ M) in human serum sample.



**Table S1.** Detailed results for the BET surface area, pore volume and pore size of OPA-CsPbBr<sub>3</sub> NCs.

|                         | Surface area<br>(m <sup>2</sup> /g) | Pore volume<br>(cm <sup>3</sup> /g) | Pore size<br>(nm) |
|-------------------------|-------------------------------------|-------------------------------------|-------------------|
| OPA-CsPbBr <sub>3</sub> | 337.24                              | 0.2835                              | 2.3932            |

**Table S2.** Comparison of the K<sub>m</sub> and V<sub>max</sub> values of OPA-CsPbBr<sub>3</sub> for catalyzing substrate with other nature enzymes and mimetic oxidase.

| Catalyst                                 | Substrate            | K <sub>m</sub> (mM) | V <sub>max</sub>                         | Ref.         |
|------------------------------------------|----------------------|---------------------|------------------------------------------|--------------|
| Ascorbic acid oxidase                    | AA                   | 0.050-0.064         | 23.70-26.82 μmol/min                     | [1]          |
| Cholesterol oxidase                      | Chol                 | 0.052               | -                                        | [2]          |
| Glucose oxidase (GOx)                    | Glu                  | 1.37                | -                                        | [3]          |
| Glucose oxidase (GOx)                    | Glu                  | 27                  |                                          | [4]          |
| CeO <sub>2</sub>                         | TMB                  | 1.52                | 2.5×10 <sup>-7</sup> M·s <sup>-1</sup>   | [5]          |
| Fe-N/C                                   | TMB                  | 0.62                | 5.26×10 <sup>-7</sup> M·s <sup>-1</sup>  | [6]          |
| Co <sub>0.6</sub> /NC-700                | TMB                  | 0.35                | 3.08×10 <sup>-7</sup> M·s <sup>-1</sup>  | [7]          |
| CuFe-PBA-NC                              | TMB                  | 0.09                | 25.62×10 <sup>-6</sup> M·s <sup>-1</sup> | [8]          |
| Heparin-OsNPs                            | TMB/Hg <sup>2+</sup> | 0.051               | 3.28×10 <sup>-7</sup> M·s <sup>-1</sup>  | [9]          |
| Polydopamine-Fe <sup>3+</sup><br>nanorod | TMB                  | 0.095               | 4.37×10 <sup>-8</sup> M·s <sup>-1</sup>  | [10]         |
| MOF-818                                  | 3,5-DTBC             | 0.81                | 3.17×10 <sup>-6</sup> M·s <sup>-1</sup>  | [11]         |
| Mn/Fe-MIL(53)-2                          | TMB                  | 0.34                | -                                        | [12]         |
| CeO <sub>2</sub> NPs-MOF                 | Cr(VI)               | 0.11                | 5.86×10 <sup>-7</sup> M·s <sup>-1</sup>  | [13]         |
| OPA-CsPbBr <sub>3</sub> NCs              | TMB                  | 0.095               | 4.58×10 <sup>-7</sup> M·s <sup>-1</sup>  | This<br>work |

**Table S3.** Determination of AA in serum sample (dilute by 10-fold) by ratiometric fluorescent and colorimetric dual-mode sensor.

| Sample      | Detection method         | Spiked ( $\mu\text{M}$ ) | Found ( $\mu\text{M}$ ) | Recovery (%) | RSD (%<br>n=3) |
|-------------|--------------------------|--------------------------|-------------------------|--------------|----------------|
| Human serum |                          | 0                        | 2.42                    | 0            | 0              |
|             | Ratiometric fluorescence | 20                       | 24.09                   | 108.4        | 2.7            |
|             |                          | 50                       | 50.79                   | 96.7         | 2.1            |
|             |                          | 100                      | 106.41                  | 104.0        | 1.9            |
|             |                          |                          | 0                       | 2.51         | 0              |
| Colorimetry | 20                       | 23.79                    | 106.4                   | 1.7          |                |
|             | 50                       | 55.11                    | 105.2                   | 2.2          |                |
|             | 100                      | 101.84                   | 99.3                    | 2.6          |                |

### S-References:

- [1] S. Y. Leong, I. Oey, *Food Chem.* **2012**, *134*, 2075-2085.
- [2] P. R. Solanki, A. Kaushik, A. A. Ansari, A. Tiwari, B. D. Malhotra, *Sens. Actuators B Chem.* **2009**, *137*, 727-735.
- [3] J. Jung, S. Lim, *Appl. Surf. Sci.* **2013**, *265*, 24-29.

- [4] A. Umar, M. M. Rahman, S. H. Kim, Y. B. Hahn, *J. Nanosci. Nanotechnol.* **2008**, *8*, 3216-3221.
- [5] X. Cheng, L. Huang, X. Yang, A. A. Elzatahry, A. Alghamdi, Y. Deng, *J. Colloid Interface Sci.* **2019**, *535*, 425-435.
- [6] Y. Wang, Z. Zhang, G. Jia, L. Zheng, J. Zhao, X. Cui, *Chem. Commun. (Camb.)* **2019**, *55*, 5271-5274.
- [7] Y. Li, Y. Lu, X. Zhang, H. Cao, Y. Huang, *ACS Appl. Nano Mater.* **2021**, *4*, 9547-9556.
- [8] R. P. Ojha, S. Pal, R. Prakash, *Microchem. J.* **2021**, *171*, 106854.
- [9] S. B. He, Q. Q. Zhuang, L. Yang, M. Y. Lin, Y. Kuang, H. P. Peng, H. H. Deng, X. H. Xia, W. Chen, *Anal. Chem.* **2020**, *92*, 1635-1642.
- [10] Y. Ai, H. Sun, Z. Gao, C. Wang, L. Guan, Y. Wang, Y. Wang, H. Zhang, Q. Liang, *Adv. Funct. Mater.* **2021**, *31*, 2103581.
- [11] M. Li, J. Chen, W. Wu, Y. Fang, S. Dong, *J. Am. Chem. Soc.* **2020**, *142*, 15569-15574.
- [12] L. Luo, Y. Ou, Y. Yang, G. Liu, Q. Liang, X. Ai, S. Yang, Y. Nian, L. Su, J. Wang, *J. Hazard. Mater.* **2022**, *423*, 127253.
- [13] Y. Wang, R. P. Liang, J. D. Qiu, *Anal. Chem.* **2020**, *92*, 2339-2346.
